# Supplementary material for: Perfluorooctanesulfonic Acid Detection Using Molecularly Imprinted Polyaniline on a Paper Substrate
Source: MDPI journal article supplement (doi:10.3390/s20247301), 2020-12-19
Supplement: s1 [file s1]

## Supplementary Materials:

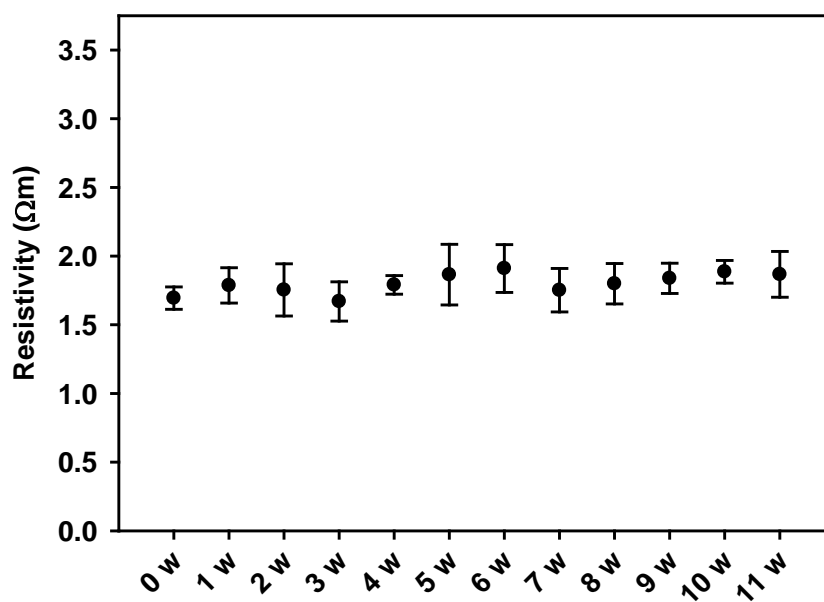

**Figure S1.** Results of the long-term stability of PANI electrodes on paper. ( $n = 4$ ).
